# Supplementary material for: Economic Uses of Salt-Tolerant Plants
Source: MDPI journal article supplement (doi:10.3390/plants12142669), 2023-07-17
Supplement: s1 [file s1]

# Supplementary Table

Supplementary Table S1 Categories of Economic Uses of salt-tolerant plants used in eHALOPH – based on the version of SEPASAL used by Aronson (1989).

| Code   | Use               | Sub Code | Use                           |        |                           |         |                      |
|--------|-------------------|----------|-------------------------------|--------|---------------------------|---------|----------------------|
| 000.0  | FOOD AND DRINK    |          |                               |        |                           |         |                      |
|        |                   |          |                               |        |                           | 00001.0 | Crop liste by<br>FAO |
|        |                   | 0100.0   | Vegetables and fruit          |        |                           |         |                      |
|        |                   |          |                               | 0110.0 | Vegetables                |         |                      |
|        |                   |          |                               |        |                           | 0115.1  | Grain                |
|        |                   |          |                               | 0120.0 | Fruit                     |         |                      |
|        |                   |          |                               | 0190.0 | Famine Food               |         |                      |
|        |                   | 0200.0   | Beverages                     |        |                           |         |                      |
|        |                   | 0300.0   | Cooking fats and oils         |        |                           |         |                      |
|        |                   |          |                               | 0310.0 | Oilseed                   |         |                      |
|        |                   | 0400.0   | Miscellaneous food and drink  |        |                           |         |                      |
|        |                   |          |                               | 0410.0 | Salt and salt substitutes |         |                      |
|        |                   | 0500.0   | Breeding stock                |        |                           |         |                      |
| 1000.0 | DOMESTIC PRODUCTS |          |                               |        |                           |         |                      |
|        |                   | 1200.0   | Soaps                         |        |                           |         |                      |
|        |                   | 1300.0   | Cosmetics                     |        |                           |         |                      |
|        |                   | 1400.0   | Dental                        |        |                           |         |                      |
|        |                   | 1700.0   | Roofing thatching green roofs |        |                           |         |                      |
| 2000.0 | TIMBER            |          |                               |        |                           |         |                      |
|        |                   | 2100.0   | Fuel                          |        |                           |         |                      |

|        |          |        |                                           |        |                                                    |  |  |
|--------|----------|--------|-------------------------------------------|--------|----------------------------------------------------|--|--|
|        |          |        |                                           | 2110.0 | Fuelwood                                           |  |  |
|        |          |        |                                           | 2120.0 | Charcoal                                           |  |  |
|        |          |        |                                           | 2130.0 | Petroleum substitute; see<br>also 8300.0 CHEMICALS |  |  |
|        |          | 2400.0 | Construction timber                       |        |                                                    |  |  |
| 3000.0 | FORAGE   |        |                                           |        |                                                    |  |  |
|        |          | 3100.0 | Grazing                                   |        |                                                    |  |  |
|        |          | 3200.0 | Browse                                    |        |                                                    |  |  |
|        |          | 3300.0 | Fodder                                    |        |                                                    |  |  |
| 4000.0 | LAND USE |        |                                           |        |                                                    |  |  |
|        |          | 4400.0 | Shade                                     |        |                                                    |  |  |
|        |          | 4500.0 | Soil stabilization                        |        |                                                    |  |  |
|        |          |        |                                           | 4510.0 | Erosion control                                    |  |  |
|        |          |        |                                           | 4520.0 | Sand stabilization                                 |  |  |
|        |          | 4600.0 | Soil improvement                          |        |                                                    |  |  |
|        |          | 4700.0 | Salt tolerance                            |        |                                                    |  |  |
|        |          | 4800.0 | Ornamental                                |        |                                                    |  |  |
|        |          |        |                                           | 4850.0 | Salt-tolerant ornamental                           |  |  |
| 5000.0 | FIBERS   |        |                                           |        |                                                    |  |  |
|        |          | 5200.0 | Textiles                                  |        |                                                    |  |  |
| 6000.0 | TOXINS   | 6000.0 |                                           |        |                                                    |  |  |
| 7000.0 | MEDICAL  |        |                                           |        |                                                    |  |  |
|        |          | 7100.0 | General including traditional<br>medicine |        |                                                    |  |  |
|        |          |        |                                           | 7160.0 | Antibiotics                                        |  |  |
|        |          |        |                                           | 7200.0 | Skin and mucosae                                   |  |  |
|        |          |        |                                           | 7500.0 | Respiratory system                                 |  |  |

|        |           |        |                        |        |                                       |  |  |
|--------|-----------|--------|------------------------|--------|---------------------------------------|--|--|
|        |           |        |                        | 7600.0 | Alimentary canal and digestive system |  |  |
|        |           |        |                        | 7800.0 | Nervous system                        |  |  |
| 8000.0 | CHEMICALS |        |                        |        |                                       |  |  |
|        |           | 8100.0 | Carbohydrates          |        |                                       |  |  |
|        |           | 8200.0 | Lipids, Essential oils |        |                                       |  |  |
|        |           | 8300.0 | Bioenergy/Biofuel      |        |                                       |  |  |
